# Supplementary material
Source: ML conference proceedings conference paper supplement (https://openaccess.thecvf.com/content/ICCV2023/html/LI_Calibrating_Uncertainty_for_ICCV_2023_paper.html)
Supplement: Supplementary file 1 [file LI_Calibrating_Uncertainty_for_ICCV_2023_supplemental.pdf]

# Calibrating Uncertainty for Semi-Supervised Crowd Counting

## —Supplementary Material—

Chen Li \* Xiaoling Hu Shahira Abousamra Chao Chen  
Stony Brook University

### A. Appendix

Append. A.1 shows quality results about which high uncertain patches are filtered out.

Append. A.2 shows that our method is reliable even with only 5% labeled samples.

Append. A.3 provides more ablation study results.

Append. A.4 illustrates the implementation details of choosing pseudo-labels.

| Method        | Ratio | Part A       |               |
|---------------|-------|--------------|---------------|
|               |       | MAE          | RMSE          |
| sup.only      | 5%    | 88.48        | 162.42        |
| w/o filtering | 5%    | 111.39       | 174.87        |
| softmax       | 5%    | 94.64        | 155.65        |
| Ours          | 5%    | <b>74.48</b> | <b>127.51</b> |

Table 9: The ablation study results of 5% labeled data.

#### A.1. Illustrate which pseudo-labels were selected and which inaccurate ones were filtered out.

Fig. 6 shows results on unlabeled samples. Green dots are predictions and red rectangles are high-uncertainty patches. On the left, we found a high-uncertainty patch within the sparse region, containing only one false positive (on the traffic light). In the middle and right samples, the high-uncertainty patches contain many false negatives due to occlusion or dark shades.

#### A.2. Is 5% labeled data enough for training reliable uncertainty estimator?

Empirical results show that 5% labeled data is sufficient to achieve superior performance on ShanghaiTech A (main paper Tab. 5 & Tab. 9) and B (Tab. 10) datasets.

#### A.3. Extra ablation study results.

In this section, we show the effectiveness of our method under 5% and 40% labeled images on the ShanghaiTech part-B dataset with extra ablation study experiments. As shown in Tab. 10, our method achieves better performance

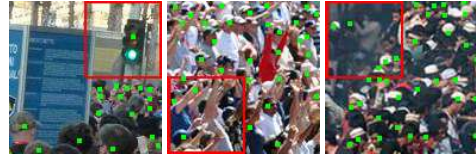

Figure 6: Qualitative results on uncertainty filtering.

under both 5% and 40% labeled image scenarios. This indicates our method can obtain superior performance for semi-supervised crowd counting under various labeled ratios on different datasets.

In Fig. 7, we show additional ablation study results.

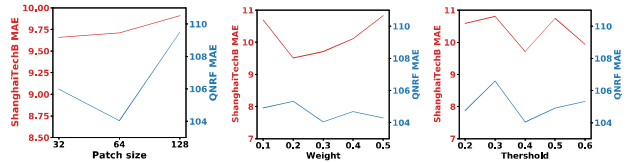

Figure 7: The hyperparameter ablation study results on ShanghaiTech B and UCF-QNRF.

#### A.4. Details of pseudo-labeling

Here we show the details of linearly increasing uncertainty threshold  $u_t$  for choosing pseudo-labels:

$$u_t = startunc + \frac{endunc - startunc}{endep - startep} (t - startep)$$

where  $u_t$  is the uncertainty threshold for choosing image patches, i.e., the image patches with uncertainty estimation higher than  $u_t$  are blanked out, and  $t$  is the current epoch number. The increase of  $u_t$  begins at epoch  $startep$  and ends at epoch  $endep$ . The uncertainty threshold increases from  $startunc$  to  $endunc$ . By using this strategy, we can utilize high-quality model predictions at different training stages properly.

Since it takes several training iterations for multitask model to capture valid crowd and uncertainty information,

\*Email: Chen Li (li.chen.8@stonybrook.edu).

we start leveraging unlabeled information from 10th epoch i.e.  $startep = 10$ . The model predictions on unlabeled images are error-prone, thus uncertainty threshold at the beginning  $startunc$  is 0.1. Besides, we have  $endep = 130$  and  $endunc = 0.6$ .

| Method       | Type | Ratio | Part B       |              |
|--------------|------|-------|--------------|--------------|
|              |      |       | MAE          | RMSE         |
| MT [4]       | SSL  | 5%    | 19.3         | 33.2         |
| L2R [2]      | SSL  | 5%    | 20.3         | 27.6         |
| GP [3]       | SSL  | 5%    | 15.7         | 27.9         |
| PA [5]       | PAL  | 5%    | 16.50        | 25.28        |
| DAccount [1] | SSL  | 5%    | <u>12.6</u>  | <u>22.8</u>  |
| ours         | SSL  | 5%    | <b>11.03</b> | <b>20.93</b> |
| MT [4]       | SSL  | 40%   | 15.9         | 25.7         |
| L2R [2]      | SSL  | 40%   | 16.8         | 25.1         |
| DAccount [1] | SSL  | 40%   | <u>9.6</u>   | <u>14.6</u>  |
| Ours         | SSL  | 40%   | <b>7.79</b>  | <b>12.70</b> |

Table 10: The ablation study results of labeled ratio on the ShanghaiTech part-B dataset.

### A.5. Implementation details

In practice, for the convenience of implementation, we use (1 - batch normalized ASM) as a surrogate to train the

uncertainty branch, and the model confidence output will be used to filter out unreliable patches.

### References

- [1] Hui Lin, Zhiheng Ma, Xiaopeng Hong, Yaowei Wang, and Zhou Su. Semi-supervised crowd counting via density agency. In *ACM MM*, 2022.
- [2] Xialei Liu, Joost Van De Weijer, and Andrew D Bagdanov. Leveraging unlabeled data for crowd counting by learning to rank. In *CVPR*, 2018.
- [3] Vishwanath A Sindagi, Rajeev Yasarla, Deepak Sam Babu, R Venkatesh Babu, and Vishal M Patel. Learning to count in the crowd from limited labeled data. In *ECCV*, 2020.
- [4] Antti Tarvainen and Harri Valpola. Mean teachers are better role models: Weight-averaged consistency targets improve semi-supervised deep learning results. In *NeurIPS*, 2017.
- [5] Yanyu Xu, Ziming Zhong, Dongze Lian, Jing Li, Zhengxin Li, Xinxing Xu, and Shenghua Gao. Crowd counting with partial annotations in an image. In *ICCV*, 2021.
